# Supplementary material for: Molecular characterization of methicillin-resistant Staphylococcus aureus among insulin-dependent diabetic individuals in Brazil
Source: Research Square preprint supplement (doi:10.21203/rs.3.rs-67652/v2), 2020-11-17
Supplement: Supplementary file 1 [file 2daaee045ea6c332eb561b1e.docx]

**Supplementary Material**

**Table S1.** Antimicrobial susceptibility profile of MSSA and MRSA isolates.

| ***S. aureus* (112)** | ***mec*A gene** | **Oxacillin**  **R S** | **Cefoxitin**  **R S** | **Linezolid**  **R S** | **Q/D**  **R S** | **S/T**  **R S** | **Vancomycin MIC* (g/mL)** |
| --- | --- | --- | --- | --- | --- | --- | --- |
| MSSA (97) | 0 | 0 97 | 0 97 | 0 97 | 0 97 | 1 96 | 0.19 – 1.5 |
| MRSA (15)  **Total (112)** | 15  15 | 7 8  7 105 | 11 4  11 101 | 0 15  0 112 | 0 15  0 112 | 0 15  1 111 | 0.38– 1.5  0.19 – 1.5 |

**Note.** Isolates identified as MSSA and MRSA based on the presence of the *mec*A gene. R= resistant; S= susceptible; Q/D=quinupristin/dalfopristin; S/T= sulfamethoxazole/trimethoprim; MIC = minimum inhibitory concentration. *Range of vancomycin susceptibility obtained for *mec*A-negative (MSSA) and *mec*A-positive (MRSA) isolates.

Dendrogram generated by the PFGE technique for MSSA isolates from insulin-dependent diabetics from Botucatu, SP. Brazil.


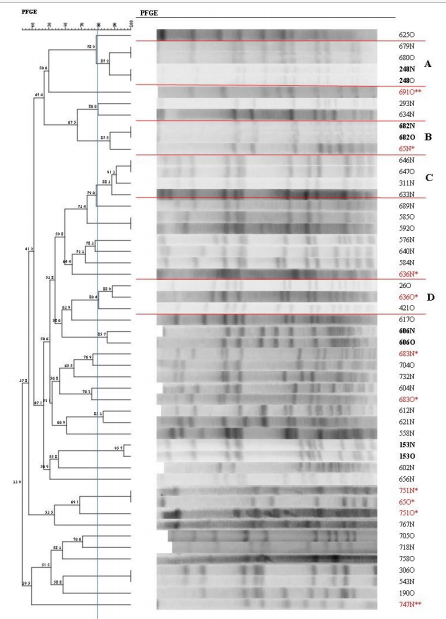


**Note.** Isolates in bold are from the same subject and have the same profile at both sampling sites (nasal/oropharyngeal). * Isolates obtained from the same subject but showing different profiles. ** The isolates identified as 691N and 747O and obtained from the same subjects as isolates 691O and 747N, respectively, were not typed with *Sma*I. N = nasal mucosa; O = oropharyngeal mucosa.

**Figure S1.** Dendrogram generated by Dice analysis/UPGMA (BioNumerics, Applied Maths) of the PFGE *Sma*I profiles of MSSA isolated from insulin-dependent diabetic individuals.


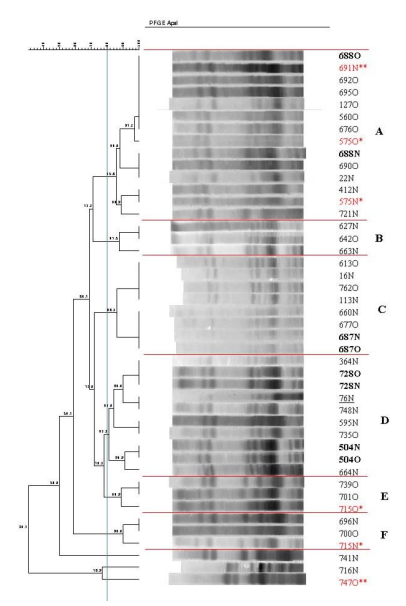


**Note.** Isolates in bold are from the same subject and have the same profile at both sampling sites (nasal/oropharyngeal)). * Isolates obtained from the same subject but showing different profiles. ** The isolates identified as 691N and 747O and obtained from the same subjects as isolates 691O and 747N, respectively, were typed with *Sma*I. Strain 76N previously isolated in another study and identified as *S. aureus* ST398 in a patient from the same city is underlined in the dendrogram. N = nasal mucosa; O = oropharyngeal mucosa.

**Figure S2.** Dendrogram generated by Dice analysis/UPGMA (BioNumerics, Applied Maths) of the PFGE *Apa*I profiles of MSSA isolated from insulin-dependent diabetic individuals.
